# Supplementary material for: Growth of flexible N-doped SiC quasialigned nanoarrays and their field emission properties
Source: Royal Society of Chemistry journal article supplement (doi:10.1039/c3tc30752b), 2013-01-01
Supplement: c3tc30752b.pdf [file c3tc30752b.pdf]

**[Electronic Supplementary Information](#)**

**Growth of Flexible N-doped SiC Quasialigned Nanoarrays and Their  
Field Emission Properties**

*Shanliang Chen<sup>1,2,3</sup>, Pengzhan Ying<sup>2</sup>, Lin Wang<sup>3</sup>, Guodong Wei<sup>3</sup>, Jinju Zheng<sup>3</sup>,  
Fengmei Gao<sup>3</sup>, Shubing Su<sup>3</sup>, and Weiyu Yang<sup>3,\*</sup>*

<sup>1</sup>School of Chemical engineering & Technology, China University of Mining and Technology,  
Xuzhou City, 221116, P.R. China.

<sup>2</sup>School of Material Science & Engineering, China University of Mining and Technology, Xuzhou  
City, 221116, P.R. China.

<sup>3</sup>Institute of Materials, Ningbo University of Technology, Ningbo City, 315016, P.R. China.

***Corresponding Author:***

***E-mail:*** [weiyuyang@tsinghua.org.cn](mailto:weiyuyang@tsinghua.org.cn) (W. Yang)

***Tel:*** +86-574-87080966, ***Fax:*** +86-574-87081221

**Table S1.** Turn-on and threshold fields<sup>a</sup> for SiC emitters and other nanostructured flexible cathodes

| Emitters                                                          | Turn-on fields<br>(V/ $\mu\text{m}$ ) | Threshold fields<br>(V/ $\mu\text{m}$ ) | Ref.      |
|-------------------------------------------------------------------|---------------------------------------|-----------------------------------------|-----------|
| N-doped nanoporous SiC                                            | 4.4 ~ 9.6                             | --                                      | 1         |
| tubular $\beta$ -SiC                                              | 5                                     | 10 at 10 mA/cm <sup>2</sup>             | 2         |
| SiC nanowires/nanorods                                            | 3.33                                  | 5.77 at 10 mA/cm <sup>2</sup>           | 3         |
| hierarchical $\beta$ -SiC nanoarchitectures                       | 12                                    | --                                      | 4         |
| aligned SiC porous nanowires                                      | 2.3 ~ 2.9                             | --                                      | 5         |
| Al <sub>2</sub> O <sub>3</sub> nanoparticle-decorated tubular SiC | 2.4                                   | 5.37 at 10 mA/cm <sup>2</sup>           | 6         |
| core-shell SiC-SiO <sub>2</sub> nanowires                         | 3.3 ~ 4.5                             | --                                      | 7         |
| bamboo-like $\beta$ -SiC nanowires                                | 10.1                                  | --                                      | 8         |
| ultrathin 3C-SiC nanobelts                                        | 3.2                                   | --                                      | 9         |
| $\beta$ -SiC nanowires                                            | --                                    | 4                                       | 10        |
| lawn-like SiC nanowires                                           | 2.1                                   | --                                      | 11        |
| carbon-coated SiC nanowires                                       | 4.2                                   | --                                      | 12        |
| BN Coated SiC Nanowires                                           | 6                                     | 20 at 10 mA/cm <sup>2</sup>             | 13        |
| N-doped SiC quasialigned nanoarrays                               | 1.90                                  | 2.53                                    | this work |
| conical nanocarbon                                                | 6.1 at 10 nA/cm <sup>2</sup>          | 9.5 at 10 $\mu\text{A}/\text{cm}^2$     | 14        |
| carbon nanotubes                                                  | 3.6                                   | --                                      | 15        |
| carbon nanofibers                                                 | --                                    | ~ 3.65 at 1 $\mu\text{A}/\text{cm}^2$   | 16        |
| tungsten oxide nanowires                                          | --                                    | 4.3 at 10 mA/cm <sup>2</sup>            | 17        |
| CdS nanowire array                                                | --                                    | 10.57 ~ 12.7                            | 18        |
| vertical ZnO nanowires/graphene hybrids                           | 2.0 ~ 2.8                             | --                                      | 19        |
| multiwall carbon nanotubes                                        | 2.05 at 1 $\mu\text{A}/\text{cm}^2$   | 2.2 at 10 $\mu\text{A}/\text{cm}^2$     | 20        |

<sup>a</sup> The turn-on and threshold fields required to generate an emission current density of 10  $\mu\text{A}/\text{cm}^2$  and 1 mA/cm<sup>2</sup>, respectively. If other values are used, it will be mentioned separately.

## References

1. M. G. Kang, H. J. Lezec and F. Sharifi, *Nanotechnology*, 2013, **24**, 065201.
2. H. Cui, Y. Sun, G. Yang, J. Chen, D. Jiang and C. Wang, *Chem. Commun.*, 2009, 6243.
3. S. Deng, Z. Li, W. Wang, N. Xu, J. Zhou, X. Zheng, H. Xu, J. Chen and J. She, *Appl. Phys. Lett.*, 2006, **89**, 023118.
4. G. Shen, Y. Bando and D. Golberg, *Cryst. Growth Des.*, 2007, **7**, 35.
5. Y. Yang, G. Meng, X. Liu, L. Zhang, Z. Hu, C. He and Y. Hu, *J. Phys. Chem. C*, 2008, **112**, 20126.
6. H. Cui, L. Gong, G. Yang, Y. Sun, J. Chen and C. Wang, *Phys. Chem. Chem. Phys.*, 2011, **13**, 985.
7. Y. Ryu, Y. Tak and K. Yong, *Nanotechnology*, 2005, **16**, S370.
8. G. Shen, Y. Bando, C. Ye, B. Liu and D. Golberg, *Nanotechnology*, 2006, **17**, 3468.
9. G. Wei, W. Qin, R. Kim, J. Sun, P. Zhu, G. Wang, L. Wang, D. Zhang and K. Zheng, *Chem. Phys. Lett.*, 2008, **461**, 242.
10. D. W. Kim, Y. J. Choi, K. J. Choi, J. G. Park, J. H. Park, S. M. Pimenov, V. D. Frolov, N. P. Abanshin, B. I. Gorfinkel and N. M. Rossukanyi, *Nanotechnology*, 2008, **19**, 225706.
11. J. Chen, Q. Shi and W. Tang, *Mater. Chem. Phys.*, 2011, **126**, 655.
12. Y. Ryu, B. Park, Y. Song and K. Yong, *J. Cryst. Growth*, 2004, **271**, 99.
13. C. Tang and Y. Bando, *Appl. Phys. Lett.*, 2003, **83**, 659.
14. P. Ghosh, M. Z. Yusop, S. Satoh, M. Subramanian, A. Hayashi, Y. Hayashi and M. Tanemura, *J. Am. Chem. Soc.*, 2010, **132**, 4034.
15. B. J. Yoon, E. H. Hong, S. E. Jee, D. M. Yoon, D. S. Shim, G. Y. Son, Y. J. Lee, K. H. Lee, H. S. Kim and C. G. Park, *J. Am. Chem. Soc.*, 2005, **127**, 8234.
16. H. Sim, S. Lau, H. Yang, L. Ang, M. Tanemura and K. Yamaguchi, *Appl. Phys. Lett.*, 2007, **90**, 143103.
17. X. Zhang, L. Gong, K. Liu, Y. Cao, X. Xiao, W. Sun, X. Hu, Y. Gao, J. Chen and J. Zhou, *Adv. Mater.*, 2010, **22**, 5292.
18. H. Li, J. M. Green and J. Jiao, *J. Phys. Chem. C*, 2008, **112**, 15140.
19. J. O. Hwang, D. H. Lee, J. Y. Kim, T. H. Han, B. H. Kim, M. Park, K. No and S. O. Kim, *J. Mater. Chem.*, 2011, **21**, 3432.
20. I. Lahiri, V. P. Verma and W. Choi, *Carbon*, 2011, **49**, 1614.
